# Supplementary material for: Tryptophan metabolite 5-methoxytryptophan ameliorates arterial denudation-induced intimal hyperplasia via opposing effects on vascular endothelial and smooth muscle cells
Source: publisher site journal article supplement (doi:10.18632/aging.102350), 2019-10-09
Supplement: Supplementary file [file aging-v11i19-102350-supplementary-material-SD1.pdf]

## SUPPLEMENTARY FIGURES

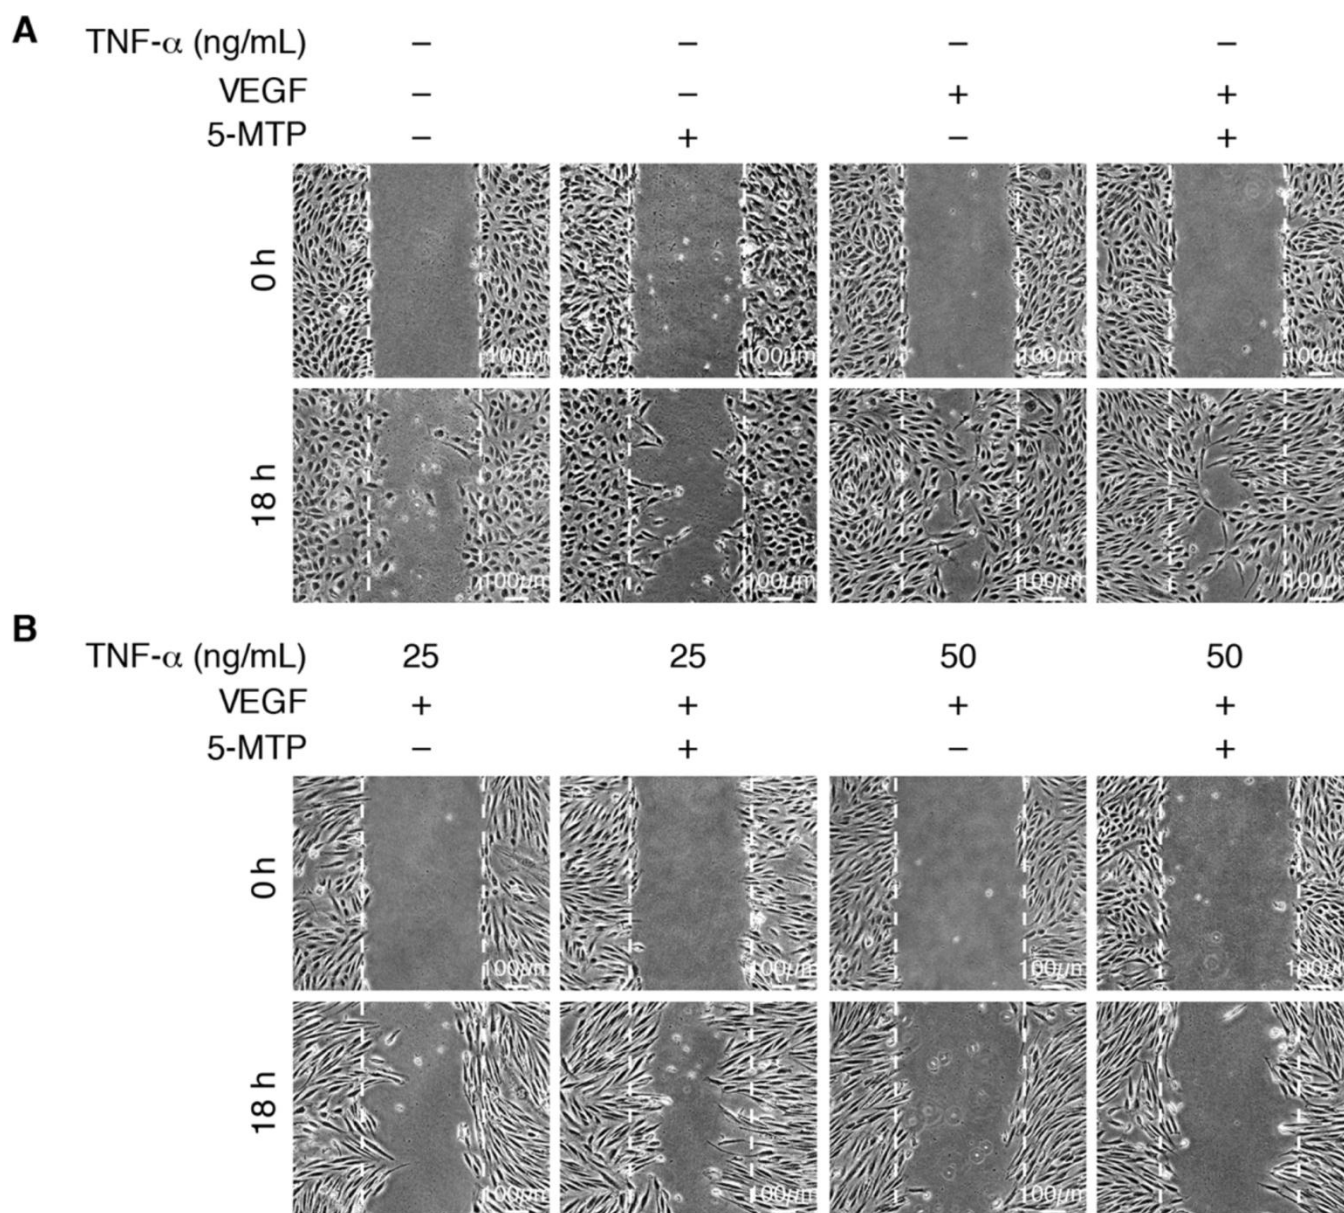

**Supplementary Figure 1. 5-MTP rescues TNF- $\alpha$ -decreased endothelial cell migration.** Serum-starved HUVECs were incubated with vehicle DMSO or 5-MTP before treatment with different concentrations of TNF- $\alpha$  (0, 25, 50 ng/mL) for 24 h. Cells were then wounded with a p200 tip and then stimulated with 50 ng/mL VEGF for cellular migration and wound closure. Photographs were taken at time 0 and 18 h after wounding. **(A)** Wound closure at 0 h and 18 h after wounding of cells without any treatment, 5-MTP only, VEGF only, or treated with VEGF and 5-MTP. Dashed lines demarcate wound margins. Representative images are shown. **(B)** Wound closure at 0 h and 18 h after wounding of cells treated with VEGF and TNF- $\alpha$  (25 or 50 ng/mL), in the presence or absence of 5-MTP. Dashed lines demarcate wound margins. Representative images are shown.

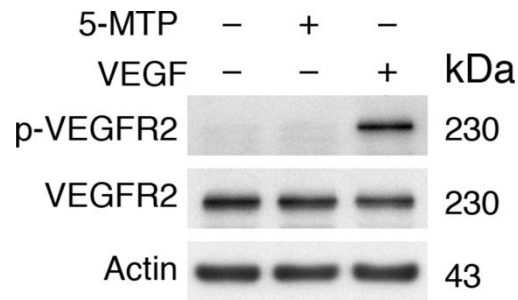

**Supplementary Figure 2. 5-MTP does not affect VEGFR2 phosphorylation in endothelial cells without stimulation.** Serum-starved HUVECs were incubated with vehicle or 5-MTP for 24 h before stimulation with or without 50 ng/mL VEGF for 15 min. Total proteins were then prepared for Western blotting to detect phosphorylated and total VEGFR2, and pan-actin for loading control.

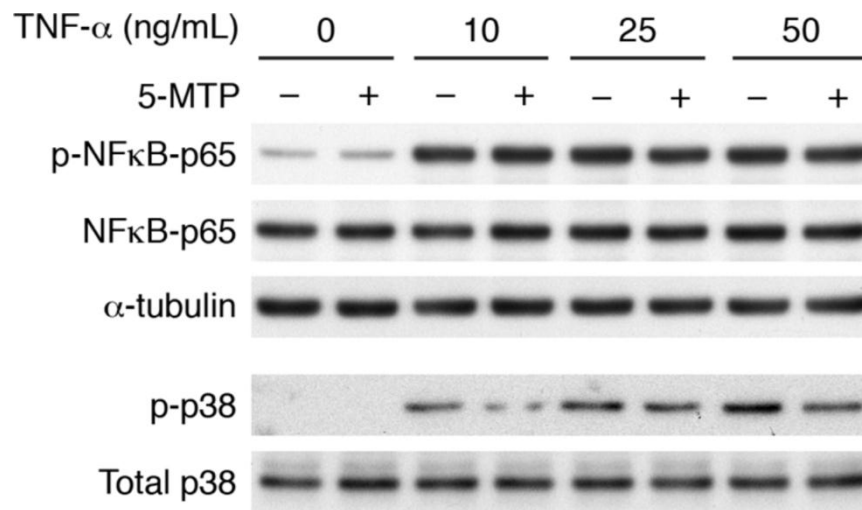

**Supplementary Figure 3. 5-MTP suppresses TNF- $\alpha$ -induced p38 activation but does not affect NF $\kappa$ B activation in endothelial cells.** HUVECs were pretreated with vehicle or 5-MTP and then stimulated with different concentrations of TNF- $\alpha$  for 15 min. Western blotting was performed to detect phosphorylated and total p38 and NF $\kappa$ B-p65. To further verify equal loading, the blots were probed with a  $\alpha$ -tubulin antibody. A representative of 3 independent experiments is shown.

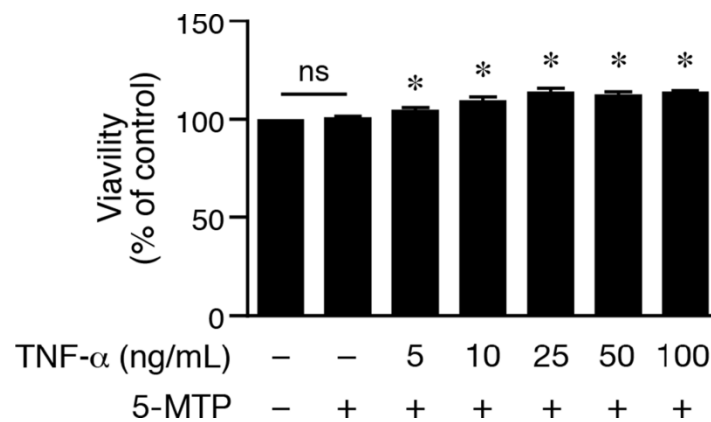

**Supplementary Figure 4. 5-MTP does not affect VSMC viability in the absence or presence of TNF- $\alpha$ .** Serum-starved VSMCs were incubated with vehicle or 5-MTP before stimulation with or without TNF- $\alpha$  for 24 h. Cell viability was then determined by MTT assays. Cell viability was normalized to control without 5-MTP and TNF- $\alpha$  (set as 100%). n=3. ns, no significance; \*p<0.02 vs. control.
